# Supplementary material for: Cyclin‐dependent kinase 4/6 inhibitors suppress tumor growth in extramammary Paget’s disease
Source: PubMed Central journal article supplement — Cancer Sci. 2021 Dec 13;113(2):802–7. doi: 10.1111/cas.15234 (PMC8819308; doi:10.1111/cas.15234), 2021-12-13
Supplement: CAS-113-802-s001.pdf [file CAS-113-802-s001.pdf]

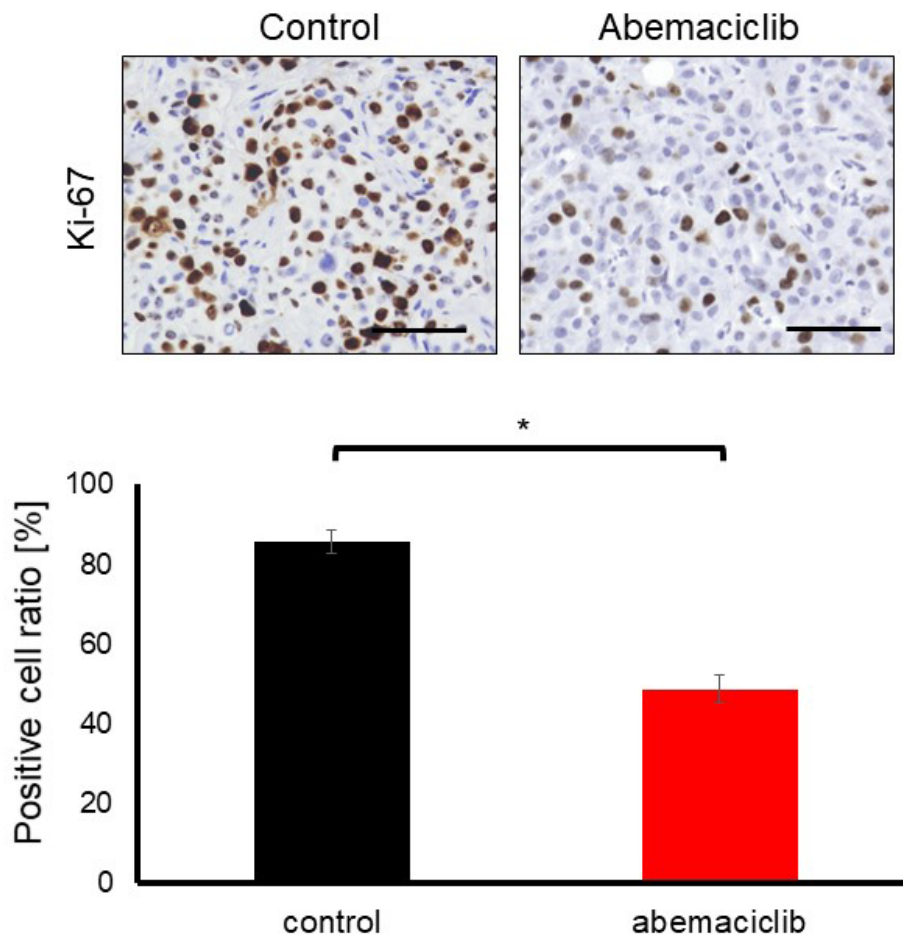

**Supplemental Figure S1. The administration of abemaciclib inhibits cell proliferation in EMPD-PDX.**

Upper: Representative images of Ki-67 staining (left: control, right; abemaciclib; Scale bar = 100  $\mu$ m).

Lower: The Ki-67 positive cells (brown) were counted (Columns, mean percentage of Ki-67 positive cells, n = 3, determinations based on examination of 100 tumor cells; bars, SD). \* $p$  < 0.05, by t-test.

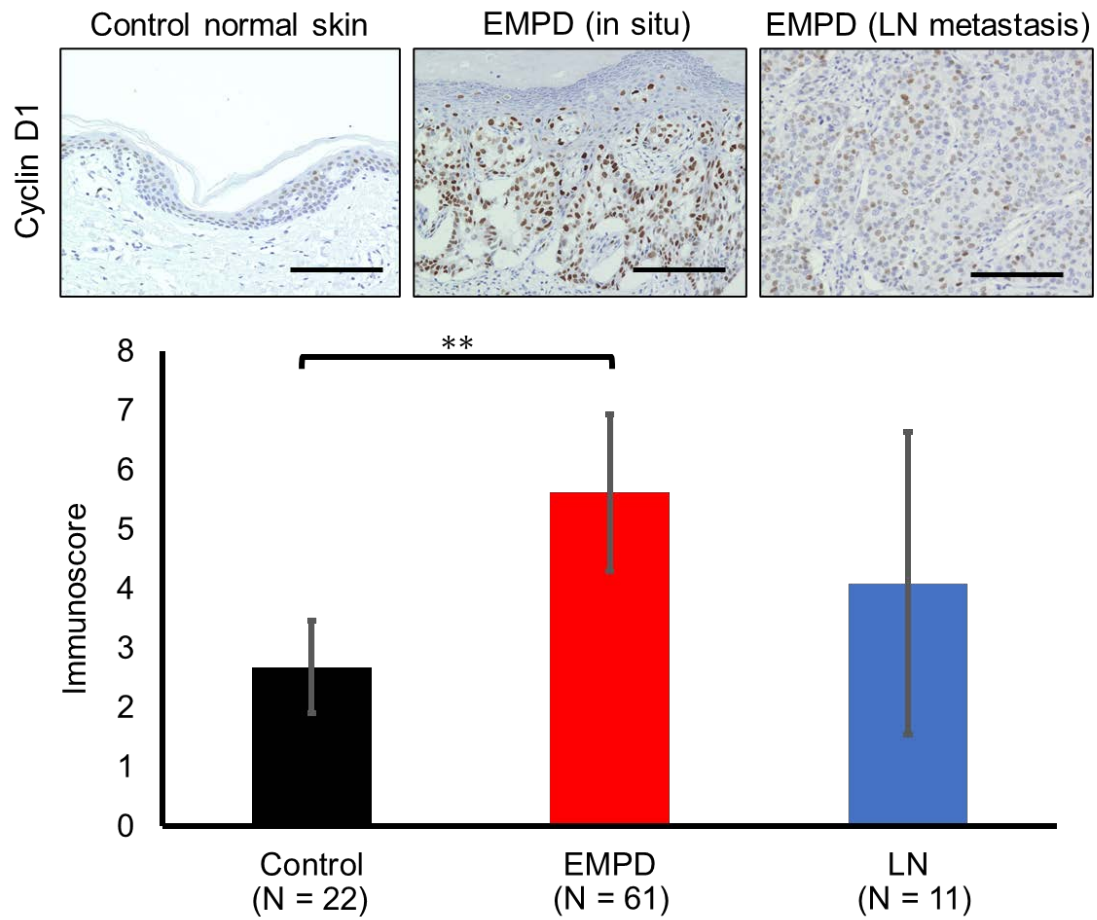

**Supplemental Figure S2. The expression of cyclin D1 is high in extramammary Paget's disease**

Upper: Cyclin D1 immunostaining was performed using specimens of normal skin (N = 22), primary tumor (N = 61), and metastatic lymph node (LN, N = 11). The panels are representative images. Scale bars = 100  $\mu$ m.

Lower: The bar graph shows the cyclin D1 immunoscore (IS). \*\*p<0.01
