# Supplementary material for: Cyclin‐dependent kinase 4/6 inhibitors suppress tumor growth in extramammary Paget’s disease
Source: PubMed Central journal article supplement — Cancer Sci. 2021 Dec 13;113(2):802–7. doi: 10.1111/cas.15234 (PMC8819308; doi:10.1111/cas.15234), 2021-12-13
Supplement: CAS-113-802-s002.pdf [file CAS-113-802-s002.pdf]

**Supplemental table S1. Clinical summary of 61 EMPD patients.**

|                               |                         | Number                 | Proportion |
|-------------------------------|-------------------------|------------------------|------------|
| Case                          | primary lesion          | 61                     | 84.70%     |
|                               | metastatic LN           | 11                     | 15.30%     |
| Age                           | range<br>(mean, median) | 53 – 94<br>(74.96, 75) |            |
| Sex                           | male                    | 36                     | 59.00%     |
|                               | female                  | 25                     | 41.00%     |
| Observation period<br>[month] | range<br>(mean, median) | 1 – 96<br>(36.03, 36)  |            |
| Clinical stage                | Ia                      | 27                     | 44.26%     |
|                               | Ib                      | 23                     | 37.70%     |
|                               | II                      | 2                      | 3.28%      |
|                               | III                     | 3                      | 4.92%      |
|                               | IV                      | 6                      | 9.84%      |
| Outcome                       | alive                   | 52                     | 85.25%     |
|                               | dead                    | 9                      | 14.75%     |
